# Supplementary material
Source: PubMed Central journal article supplement (PMC6955156)
Supplement: EMS84774-supplement-Supplementary_note.pdf [file EMS84774-supplement-Supplementary_note.pdf]

| Protein | Residue | Sequence                                                                           | Residue | Sequence | Residue | Sequence | Residue | Sequence | Residue | Sequence |
|---------|---------|------------------------------------------------------------------------------------|---------|----------|---------|----------|---------|----------|---------|----------|
| LEDGF   | 1       | MTRDFKPGDLIFAKMKGYPHWPARVDEVPDGAVKPP-----TNK-LP-FFFGTHE-----TAFLGPKDIFPYS          | 62      |          |         |          |         |          |         |          |
| HDGF2   | 1       | MPHAFKPGDLVFAKMKGYPHWPARVDDIADGAVKPP-----PNK-YPIFFFGTHE-----TAFLGPKDLFPYD          | 62      |          |         |          |         |          |         |          |
| HDGF13  | 5       | RPREYKAGDLVFAKMKGYPHWPARVDELPEGAVKPP-----ANK-YPIFFFGTHE-----TAFLGPKDLFPYK          | 66      |          |         |          |         |          |         |          |
| HDGF    | 6       | RQKEYKCGDLVFAKMKGYPHWPARVDEMPEAAVKST-----ANK-YQVFFFGTHE-----TAFLGPKDLFPYE          | 67      |          |         |          |         |          |         |          |
| HDGF11  | 1       | ~MPMYKSGDLVFAKMKGYAHWPARVEHMT-----Q-----PNR-YQVFFFGTHE-----TAFLSPKRLFPYK           | 55      |          |         |          |         |          |         |          |
| MUM1    | 405     | EPRSEVGMVLVWHKHKKYPPFWPAVVKSVRQRDKKA-----S-VLYIEGHMNPMMKGFVSLKSLKHF-               | 465     |          |         |          |         |          |         |          |
| N-PAC   | 2       | AAVSLRLGDLVWGKLGGRYPWPWGKIVNPPKDLKKPR-----GK-KCFVFKFFGTED-----HAWIKVEQLKPYH        | 64      |          |         |          |         |          |         |          |
| DNMT3A  | 286     | DGRGFGIGELVWGKLGGRYSWWPGRIVSWMMTGRSRA-----AEGTRVWVWFGDGKF-----SVVCVGLKMP-LS        | 348     |          |         |          |         |          |         |          |
| DNMT3B  | 219     | DGKEFGIGDLVWGKLGGRYSWWPAMVSVWATSQRQA-----MSGMRVWVWFGDGKF-----SEVSADKLV-LG          | 281     |          |         |          |         |          |         |          |
| MBD5    | 1379    | RPRTFNVGDLVWGQIKGLTSWPKLVREDDVHNSCQ-----S-VLYIEGHMNPMMKGFVSLKSLKHF-                | 1432    |          |         |          |         |          |         |          |
| PWWP2A  | 649     | DGRTICVGDIVWAKLYGFPWWPARTLITITVSRKDNG-----LL--VRQEARISWFGSP-T-----TSFLALSQSPFL     | 713     |          |         |          |         |          |         |          |
| BRPF1   | 1079    | EDSPLDALDLVWAKCRGYPSYPALIIDPKMPREGMFHHGVPIVPPPLEVLKLGEOQTQEAHEHLYLVLFDFDNKRT---    | 1166    |          |         |          |         |          |         |          |
| BRPF3   | 1070    | DRGDLEPLELVWAKCRGYPSYPALIIDPKMPREGLLHNGVPIVPPPLDVLKLGEOQKQAEAGEKLFLVLFDFDNKRT---   | 1157    |          |         |          |         |          |         |          |
| BRPF2   | 923     | AASVLEPLKVVWAKCSGYPSYPALIIDPKMPRVPGHHNGVTIPAPPLDVLKIGEHOQTSKDEKLFLVLFDFDNKRS---    | 1010    |          |         |          |         |          |         |          |
| NSD1_C  | 1750    | AGKKPHYREIVWVKVGRYRWWPAEICHPRVAPSNID-----KMRHDVGEFFVLFVFGSN-D-----YLVWTHQARVFPYM   | 1816    |          |         |          |         |          |         |          |
| NSD2_C  | 874     | AGKKLHFQDIIVWVKLGNRYRWWPAEIVCHPKNVPPNIQ-----KMKHEIGEFPVFFVFGSK-D-----YYWTHQARVFPYM | 940     |          |         |          |         |          |         |          |
| NSD3_C  | 954     | AGKKLHYKQIVWVKLGNRYRWWPAEICNPRSVPLNIQ-----GLKHDLDGDFVFFVFGSH-D-----YYWVHQGRVFPYV   | 1020    |          |         |          |         |          |         |          |
| NSD1_N  | 317     | TPLKYEVGDLVWAKKRRPWPWCRTICSDPLINTHSK-----MKVSNRRPYRQYYVEAFGDPSE-----RAWVAGKAIVMFE  | 387     |          |         |          |         |          |         |          |
| NSD2_N  | 216     | HLLKYNVGDVWVKVSGYPPWPCMVSSADPLLHSYTK-----LKGQ-KKSARQYHVQFFGDAPE-----RAWIFBKSLVAFE  | 285     |          |         |          |         |          |         |          |
| NSD3_N  | 264     | TGKVFQGDVWVKVGYTPWPCMVSSDPQLVHTK-----IN--TRGAREYHVQFFSNQPE-----RAWVHKKRVREYK       | 331     |          |         |          |         |          |         |          |
| MSH6    | 86      | TSCDFSPGDLVWAKMEGYPPWPCLVYNHPFDGTFIR-----EKGKSVR-VHVQFFDDSPSPT-----RGWVSKRLLKPYT   | 152     |          |         |          |         |          |         |          |
| ZMYND8  | 266     | CEPCSNPHPLVWAKLKGFPFWPAKALRDKDGQV-----DARFFGQH-D-----RAWVPIINCYLM-                 | 319     |          |         |          |         |          |         |          |
| ZMYND11 | 180     | CYPCIPNHELWAKMKGFGFWPAKVMQKEDNQV-----DVRFFGHHH-----RAWIPSENIQDI-                   | 234     |          |         |          |         |          |         |          |
| ZCWPW1  | 311     | AYASYIPGSIIVAKQYGYPPWPGMTIESDPLGEYFL-----FTSHLDSLPSKYHVTFEGETVS-----RAWIPVNMLKNFQ  | 381     |          |         |          |         |          |         |          |
| ZCWPW2  | 92      | VYSQLPLGSLVVLVLIQNWPSWPGILCPDRFKGKYVT-----YDP--DGNVEEYHHEFLGDPHS-----RSWIKATFVGHYS | 160     |          |         |          |         |          |         |          |

| Protein | Residue | Sequence                                                                                   | Residue | Sequence | Residue | Sequence | Residue | Sequence | Residue | Sequence |
|---------|---------|--------------------------------------------------------------------------------------------|---------|----------|---------|----------|---------|----------|---------|----------|
| LEDGF   | 63      | ENKEKYGKPN-----KRRG-----FNEGWEIENNPKVKFS-----                                              | 93      |          |         |          |         |          |         |          |
| HDGF2   | 63      | KCKDKYGKPN-----KRRG-----FNEGWEIQNNPHASYS-----                                              | 93      |          |         |          |         |          |         |          |
| HDGF13  | 67      | EYKDKFGKSN-----KRRG-----FNEGWEIENNPGVKFT-----                                              | 97      |          |         |          |         |          |         |          |
| HDGF    | 68      | ESKEKFGKPN-----KRRG-----FSEGLWEIENNPTVKAS-----                                             | 98      |          |         |          |         |          |         |          |
| HDGF11  | 56      | ECKEKFVKPN-----KRRG-----FSAGLWEIENNPTVQAS-----                                             | 86      |          |         |          |         |          |         |          |
| MUM1    | 466     | DCKEKQTLNLQ-----AREE-----FNQDIGWCVSLITDYVRLVGLCGSFAAGSFLYYAADISYPVRKSIQQD-----             | 527     |          |         |          |         |          |         |          |
| N-PAC   | 65      | AHKEEMIKIN-----KRRG-----FQQAVDAVEEFLRRRAKGDQTSSSHNSDDKNR-----                              | 110     |          |         |          |         |          |         |          |
| DNMT3A  | 349     | SFCSAFHQATYN-----KQPMYRKAI-----Y-EVLQVASSRAGKLPVCHDSDESDTAKAVEVQNKPMIEWALGGFQPSGPKGLEPPE   | 426     |          |         |          |         |          |         |          |
| DNMT3B  | 282     | LFSQHFNLATFN-----KLVSYRKAM-----Y-HALEKARVRAGKTFP-----SSPGDS---LEDQLKPMLEWAHGGFKPTGIEGLKPNN | 352     |          |         |          |         |          |         |          |
| MBD5    | 1433    | GLEAYSrvRKRN-----RKSGLNNHLEAAIHEAMSELDKMSGTVHQIP-----                                      | 1476    |          |         |          |         |          |         |          |
| PWWP2A  | 714     | ENFQSRFNK-----KRRGL-----YRKATTEAATAAKQLTPEVRALLTQFET-----                                  | 755     |          |         |          |         |          |         |          |
| BRPF1   | 1167    | VNQDLDEKMLE-----GRKSNIRKSVQIAYHRAIQHRSKVQGEQS-----                                         | 1207    |          |         |          |         |          |         |          |
| BRPF3   | 1158    | VEDTVDKLMLE-----GRKTSIRKSVQVAYDRAMIHLSRVRGPHS-----                                         | 1198    |          |         |          |         |          |         |          |
| BRPF2   | 1011    | IDETIDKLMME-----GRNSSIRKAVRIAEDRAMNHLSRVHGEP-----                                          | 1051    |          |         |          |         |          |         |          |
| NSD1_C  | 1817    | EGDVSSKDKMGK-----GVDGT-----YKKALQEAARFEELKA-----                                           | 1850    |          |         |          |         |          |         |          |
| NSD2_C  | 941     | EGDRGSRYQGVR-----GIGRV-----FKNALQEAARFREIKL-----                                           | 974     |          |         |          |         |          |         |          |
| NSD3_C  | 1021    | EGDKSF-AEGQT-----SINKT-----FKKALEEAARFQELKA-----                                           | 1053    |          |         |          |         |          |         |          |
| NSD1_N  | 388     | GRHQFEELPVLRRRG-----KQKEKG-----YRHKVPPKILSKWEASVGLAEQ-----                                 | 430     |          |         |          |         |          |         |          |
| NSD2_N  | 286     | GEGQFEKLCQESAKQAPTKAETK-----LLKPIISGKLRAQWEMGIVQAEAAASMSVEERKAKFTF-----                    | 346     |          |         |          |         |          |         |          |
| NSD3_N  | 332     | GHKQYEELLAETKQASNHSEKQK-----IRKPRQRERAQWDIGIAHAEK-----                                     | 377     |          |         |          |         |          |         |          |
| MSH6    | 153     | GSKSKEAQKG-----GHFYSAKPE-----ILRAVQRADEALNKDKIKRLELAVCDEPSE-----                           | 201     |          |         |          |         |          |         |          |
| ZMYND8  | 320     | -SKEIPFSVKK-----TKSI-----FNSAMQEMEYVENIRKRFVFNYS-----                                      | 358     |          |         |          |         |          |         |          |
| ZMYND11 | 235     | -TVNIHRLHVK-----RSMG-----WKKACDELELHQRFLRE--GRFWKS-----                                    | 271     |          |         |          |         |          |         |          |
| ZCWPW1  | 382     | ELSLELSVM-----KRRRN-----DCSQKLGVALMMAQEAQIISIQERVNLFQFWSRFNGSNSN-----                      | 435     |          |         |          |         |          |         |          |
| ZCWPW2  | 161     | ITLKEPKCK-----NKKK-----WYKSALQEAACLLYGSHEQRLEMCLSKLQDKSETHDKVA-----                        | 213     |          |         |          |         |          |         |          |

**Supplementary Note: Structure-guided sequence alignment of all known PWWP domains in human proteins.** There are over 20 PWWP domain-containing proteins encoded in the human genome that can be categorized into 6 classes. The sequence alignment was first generated by Clustal Omega and then manually adjusted based on known structures to match the putative DNA interacting basic residues in loop regions at similar positions. Putative DNA interacting basic residues in the patches 1 and 2 are highlighted in green. Residues forming the aromatic cage for methyllysine binding are marked with yellow circles. Other conserved residues (mainly in the conserved hydrophobic core) are colored in grey scale based on the score of conservation.
