# Supplementary material
Source: PubMed Central journal article supplement (PMC6955156)

**Source Data Extended Data Fig. 1**  
Uncropped EMSA gel (cf. Extended Data Figure 1a)

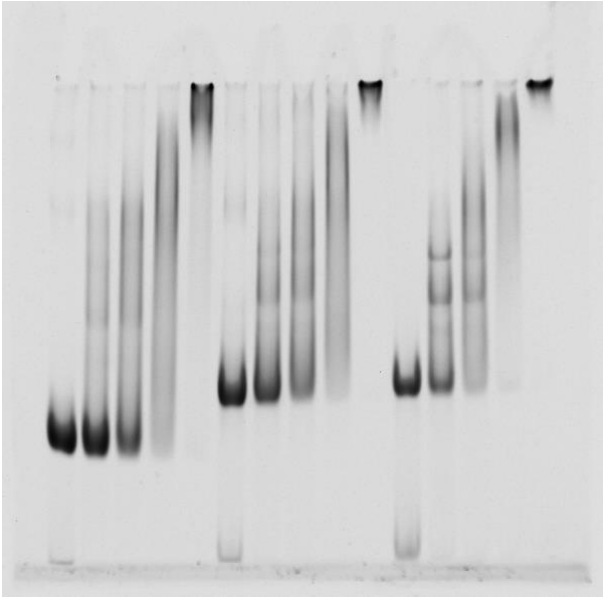

Supplement: EMS84774-supplement-Source_Data_Extended_Data_Figure_1.pdf [file EMS84774-supplement-Source_Data_Extended_Data_Figure_1.pdf]
